# Supplementary material for: Relative availability of natural prey versus livestock predicts landscape suitability for cheetahs Acinonyx jubatus in Botswana
Source: PeerJ. 2015 Jul 9;3:e1033. doi: 10.7717/peerj.1033 (PMC4512768; doi:10.7717/peerj.1033)
Supplement: Data S4 — The percentage grid cells per stratum with ≤20% cheetah prey and the Natural Breaks (Jenks) function in ArcMap 9.3.1 to classify the strata into five classes of suitability were used in the predictive map of the landscape suitability in Botswana for cheetahs. [file peerj-03-1033-s004.xlsx]

## Sheet: % Grids with less 20% prey
Appendix 4. Number and percentage of aerial survey grids with ≤ 20% cheetah wild prey with corresponding suitability class.
Management Zone	Stratum	Stratum ID	Sub-stratum	Sub-stratum ID	Number of grids in stratum	Number of grids with ≤ 20% cheetah wild prey	% Grids with ≤ 20% cheetah wild prey	Suitability Class
Northern Conservation	Okavango Delta	1.1	Chief's Island	1.1.1	0
Northern Conservation	Okavango Delta	1.1	Dry Woodland	1.1.2	3	0	0	Very high
Northern Conservation	Okavango Delta	1.1	Eretsa community	1.1.3	2	0	0	Very high
Northern Conservation	Okavango Delta	1.1	Lower Delta	1.1.4	3	1	33.3333	Medium
Northern Conservation	Okavango Delta	1.1	Permanent Swamp East	1.1.5	2	0	0	Very high
Northern Conservation	Okavango Delta	1.1	Permanent Swamp Central	1.1.6	5	1	20	High
Northern Conservation	Okavango Delta	1.1	Seasonal Floodplain West	1.1.7	4	0	0	Very high
Northern Conservation	Okavango Delta	1.1	Seasonal Floodplain Central	1.1.8	7	0	0	Very high
Northern Conservation	Okavango Delta	1.1	Seasonal Floodplain North East	1.1.9	3	0	0	Very high
Northern Conservation	Okavango Delta	1.1	Seasonal Flooplain North West	1.1.10	0
Northern Conservation	Okavango Delta	1.1	Western Delta and Sandveld Tongue	1.1.11	5	0	0	Very high
Northern Conservation	Kwando/Chobe	1.2	Chobe	1.2.1	3	0	0	Very high
Northern Conservation	Kwando/Chobe	1.2	Enclave community	1.2.2	1	1	100	Unsuitable
Northern Conservation	Kwando/Chobe	1.2	Kwando Linyanti	1.2.3	8	0	0	Very high
Northern Conservation	Dry North	1.3	Kwando Delta link	1.3.1	14	0	0	Very high
Northern Conservation	Dry North	1.3	Masame	1.3.2	22	1	4.54545	Very high
Northern Conservation	Dry North	1.3	Ngami North	1.3.3	4	0	0	Very high
Northern Conservation	Dry North	1.3	Nogatsaa	1.3.4	6	0	0	Very high
Northern Conservation	Dry North	1.3	Nunga	1.3.5	10	0	0	Very high
Northern Conservation	Dry North	1.3	Savuti Mababe	1.3.6	9	0	0	Very high
Northern Conservation	Pandamamtenga	1.4	Kazangula	1.4.1	3	1	33.3333	Medium
Northern Conservation	Pandamamtenga	1.4	Panda Farms	1.4.2	0
Northern Conservation	Pandamamtenga	1.4	Pandamatenga	1.4.3	6	0	0	Very high
Northern Conservation	Makgadikgadi Pans	1.5	Pans Community	1.5.1	5	3	60	Low
Northern Conservation	Makgadikgadi Pans	1.5	Pans Community Area	1.5.2	3	2	66.6667	Low
Northern Conservation	Makgadikgadi Pans	1.5	Pans NP	1.5.3	15	1	6.66667	High
Southern Conservation	CKGR	2.1	CKGR North	2.1.1	41	0	0	Very high
Southern Conservation	CKGR	2.1	CKGR SE	2.1.2	3	0	0	Very high
Southern Conservation	CKGR	2.1	CKGR South	2.1.3	68	3	4.41176	Very high
Southern Conservation	CKGR	2.1	Khutse	2.1.4	10	0	0	Very high
Southern Conservation	KTP	2.2			60	0	0	Very high
Southern Conservation	KTP WMA	2.3	CKGR Buffer	2.3.1	11	0	0	Very high
Southern Conservation	KTP WMA	2.3	Western corridor	2.3.2	63	10	15.873	High
Southern Conservation	KTP WMA	2.3	KTP buffer	2.3.3	47	0	0	Very high
Southern Conservation	KTP WMA	2.3	KTP buffer west	2.3.4	16	0	0	Very high
Southern Conservation	KTP WMA	2.3	Eastern corridor 1	2.3.5	2	1	50	Medium
Southern Conservation	KTP WMA	2.3	Eastern corridor 2	2.3.6	21	0	0	Very high
Southern Conservation	KTP WMA	2.3	Eastern corridor 3	2.3.7	2	2	100	Unsuitable
Xaixai Conservation	Xaixai Core	3.1			18	3	16.6667	High
Xaixai Conservation	Xaixai Perifery	3.2			16	2	12.5	High
Tuli Conservation	Tuli Game Reserve	4.1			2	0	0	Very high
Central Agricultural	Central Tuli farms	5.1			10	2	20	High
Central Agricultural	Central Molalatau	5.2			14	9	64.2857	Low
Central Agricultural	Central East	5.3			100	88	88	Unsuitable
Central Agricultural	Central North	5.4			22	16	72.7273	Low
Central Agricultural	Central Pans	5.5			2	0	0	Very high
Central Agricultural	Central Mopipi	5.6			6	6	100	Unsuitable
Central Agricultural	Central West	5.7			106	34	32.0755	Medium
Ngami Agricultural	Ngami East	6.1			1	1	100	Unsuitable
Ngami Agricultural	Ngami Thamalakane Boteti	6.2			8	8	100	Unsuitable
Ngami Agricultural	Ngami South	6.3			39	25	64.1026	Low
Ngami Agricultural	Ngami Panhandle	6.4			18	18	100	Unsuitable
Ngami Agricultural	Ngami Tsodilo	6.5			26	5	19.2308	High
Ngami Agricultural	Ngami North West	6.6			5	2	40	Medium
Ngami Agricultural	Ngami North East	6.7			4	0	0	Very high
Ghanzi Agricultural	Ghanzi Farms	7.1			29	12	41.3793	Medium
Ghanzi Agricultural	Ghanzi Community	7.2			44	33	75	Low
Kgalagadi Agricultural	Kgalagadi Kweneng	8.1			54	49	90.7407	Unsuitable
Kgalagadi Agricultural	Kgalagadi Dithopo	8.2			4	1	25	High
Kgalagadi Agricultural	Kgalagadi Gaborone	8.3			40	40	100	Unsuitable
Kgalagadi Agricultural	Kgalagadi Kane	8.4	Kgalagadi Kane 1	8.4.1	4	2	50	Medium
Kgalagadi Agricultural	Kgalagadi Kane	8.4	Kgalagadi Kane 2	8.4.2	2	2	100	Unsuitable
Kgalagadi Agricultural	Kgalagadi Molopo	8.5			39	15	38.4615	Medium
Kgalagadi Agricultural	Kgalagadi Tsabong	8.6			26	16	61.5385	Low
Kgalagadi Agricultural	Kgalagadi Middelpits	8.7			11	2	18.1818	High
Kgalagadi Agricultural	Kgalagadi Bokpits	8.8			5	5	100	Unsuitable
Kgalagadi Agricultural	Kgalagadi Kang	8.9	Kgalagadi Kang 1	8.9.1	3	1	33.3333	Medium
Kgalagadi Agricultural	Kgalagadi Kang	8.9	Kgalagadi Kang 2	8.9.2	8	8	100	Unsuitable
Kgalagadi Agricultural	Kgalagadi Kang	8.9	Kgalagadi Kang 3	8.9.3	3	1	33.3333	Medium
Kgalagadi Agricultural	Kgalagadi Hukuntsi	8.10	Kgalagadi Hukuntsi 1	8.10.1	4	0	0	Very high
Kgalagadi Agricultural	Kgalagadi Hukuntsi	8.10	Kgalagadi Hukuntsi 2	8.10.2	4	0	0	Very high
Kgalagadi Agricultural	Kgalagadi Hukuntsi	8.10	Kgalagadi Hukuntsi 3	8.10.3	11	8	72.7273	Low
				TOTALS	1175	441
